# Supplementary material for: celldeath: A tool for detection of cell death in transmitted light microscopy images by deep learning-based visual recognition
Source: PLoS One. 2021 Jun 24;16(6):e0253666. doi: 10.1371/journal.pone.0253666 (PMC8224851; doi:10.1371/journal.pone.0253666)
Supplement: S3 Table — (XLSX) [file pone.0253666.s003.xlsx]

## Sheet: Hoja1
S3 Table. Number of images in each set for all conditions (related to Table 1 and Table 2).
Condition (1h)	Training and validation sets	Test set
CPT vs. DMSO	11036	4188
ALL vs. ALL	11036	4188
PC3	1472	508
MCF7	1272	496
T47D	1316	480
U2OS	1424	828
iPS1	2128	656
iPS2	1492	496
H9	1932	724
PC3 out	12972	2252
MCF7 out	13456	1768
T47D out	13428	1796
U2OS out	13244	1980
iPS1 out	12440	2784
iPS2 out	13236	1988
H9 out	12568	2656
